# Supplementary material for: Porous Hexacyanometallate(III) Complexes as Catalysts in the Ring-Opening Copolymerization of CO2 and Propylene Oxide
Source: MDPI journal article supplement (doi:10.3390/catal11121450), 2021-11-29
Supplement: s1 [file catalysts-1466882-supplementary.pdf › catalysts-1466882-supplementary.pdf]

## Supplementary Material

# Porous Hexacyanometallate(III) Complexes as Catalysts in the Ring-Opening Copolymerization of CO<sub>2</sub> and Propylene Oxide

Guillermo Penche, Juan R. González-Velasco and M. Pilar González-Marcos \*

Chemical Technologies for Environmental Sustainability Group, Department of Chemical Engineering, Faculty of Science and Technology, University of the Basque Country UPV/EHU, P.O. Box 644, E-48080 Bilbao, Spain; guillermo.penche@ehu.eus (G.P.); juanra.gonzalezvelasco@ehu.eus (J.R.G.-V.)

\* Correspondence: mp.gonzalezmarcos@ehu.eus

**Abstract:** In this work, six porous hexacyanometallate complexes (Ni<sub>3</sub>[Co(CN)<sub>6</sub>]<sub>2</sub>, Co<sub>3</sub>[Co(CN)<sub>6</sub>]<sub>2</sub>, Fe<sub>3</sub>[Co(CN)<sub>6</sub>]<sub>2</sub>, Ni<sub>3</sub>[Fe(CN)<sub>6</sub>]<sub>2</sub>, Co<sub>3</sub>[Fe(CN)<sub>6</sub>]<sub>2</sub>, Fe<sub>4</sub>[Fe(CN)<sub>6</sub>]<sub>2</sub>) were synthesized by a complexing agent assisted coprecipitation method and thoroughly characterized via X-ray diffraction (XRD), Fourier-transform infrared spectroscopy (FT-IR), thermogravimetric analysis (TGA), in situ high-temperature X-ray diffraction (HT-XRD), elemental analysis (EA), X-ray fluorescence (XRF), scanning electron microscopy (SEM), transmission electron microscopy (TEM), N<sub>2</sub> physisorption, and gas–solid phase titration with NH<sub>3</sub>. The thermal stability, chemical composition, pore size and volume, crystallite size and density of surface acid sites were strongly sensitive to both the transition metal and the cyanometallate anion employed. On that basis, transition metal hexacyanometallates must be perceived as an adaptable class of zeolite-like microporous materials. The catalytic properties of these compounds were tested by copolymerization of propylene oxide and CO<sub>2</sub>, a green route to obtain biodegradable aliphatic polycarbonates. All compounds under study showed moderate activity in the target reaction. The obtained copolymers were characterized by modest CO<sub>2</sub> content (carbonate units ranging from 16 to 33%), random structure (R<sub>PEC</sub> ≈ 70%), and moderate molecular weight (M<sub>w</sub> = 6000–85,400 g/mol) with broad dispersity values (Đ<sub>M</sub> = 4.1–15.8).

**Keywords:** microporous materials; zeolite-like materials; transition metal hexacyanometallates; CO<sub>2</sub> utilization; copolymerization; biodegradable polymers

**Citation:** Penche, G.; González-Velasco, J.R.; González-Marcos, M.P. Porous Hexacyanometallate(III) Complexes as Catalysts in the Ring-Opening Copolymerization of CO<sub>2</sub> and Propylene Oxide. *Catalysts* **2021**, *11*, 1450. <https://doi.org/10.3390/catal11121450>

Academic Editor: Hamidreza Arandiyán

Received: 1 November 2021

Accepted: 24 November 2021

Published: 29 November 2021

**Publisher's Note:** MDPI stays neutral with regard to jurisdictional claims in published maps and institutional affiliations.

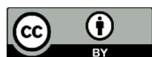

**Copyright:** © 2021 by the authors. Licensee MDPI, Basel, Switzerland. This article is an open access article distributed under the terms and conditions of the Creative Commons Attribution (CC BY) license (<https://creativecommons.org/licenses/by/4.0/>).

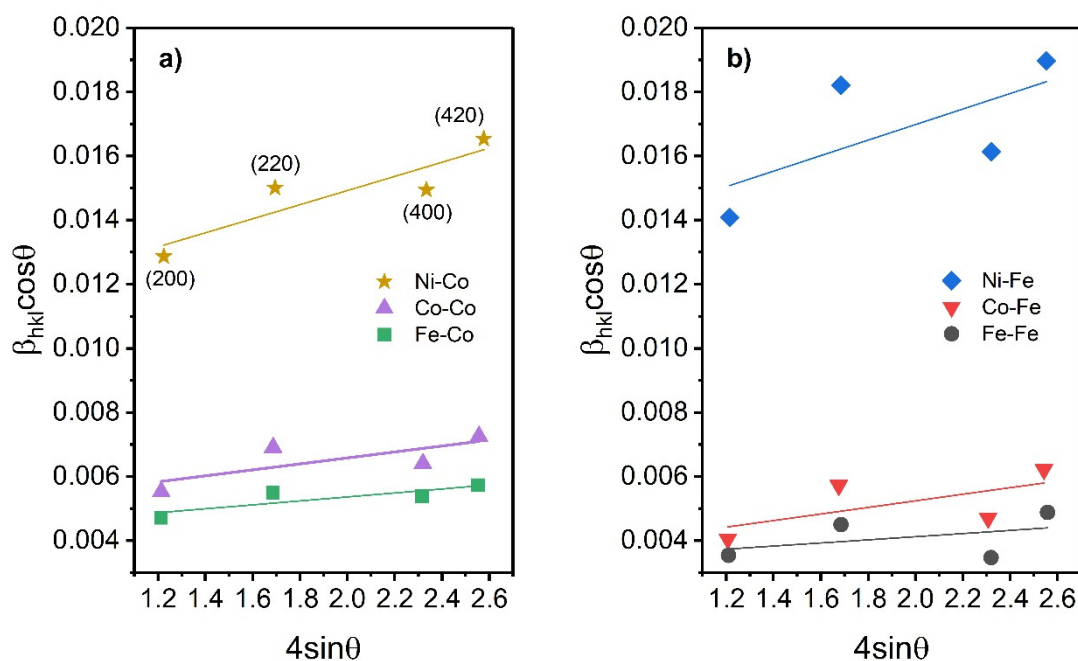

**Figure S1.** Williamson-Hall plot for (a) T-Co and (b) T-Fe compounds. Continuous lines represent the straight line fit to the data.

The Williamson-Hall (W-H) method was employed to estimate the crystallite size of the porous hexacyanometallates(III). The W-H method takes into consideration peak broadening due to lattice strain, so it is especially useful in inherently disordered and nanosized materials like the hexacyanometallates(III) here considered. The W-H equation adopts the form [80]:

$$\beta_{hkl} \cos \theta = \frac{K\lambda}{D} + 4\varepsilon \sin \theta \quad (\text{S1})$$

where  $\beta_{hkl}$ : instrumental broadening,  $K$ : shape factor (0.9),  $\lambda$ : wavelength of  $\text{CuK}\alpha$ ,  $D$ : effective particle size, and  $\varepsilon$  effective strain. The W-H plot is a plot of  $\beta_{hkl} \cos \theta$  vs.  $4 \sin \theta$ . Data is fit to a straight line. While the effective strain value is determined from the slope of the straight line, the crystallite size is calculated from the y-intercept.

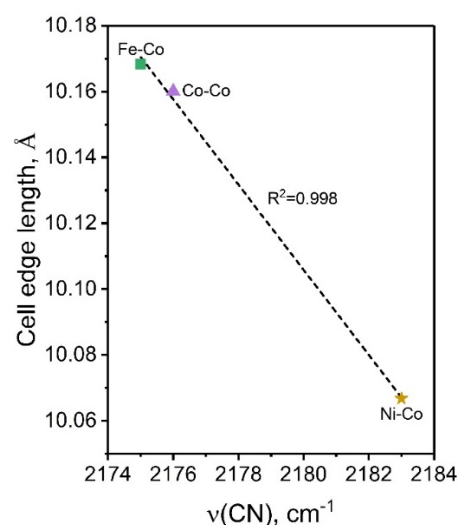

**Figure S2.** Relationship between unit cell edge length and  $\nu(\text{CN})$  band in cyanocobaltates.

The linear relationship that exists for the hexacyanocobaltate(III) complexes ( $T_3[Co(CN)_6]_2$ ) between cell edge length and the frequency of the  $\nu(CN)$  band indicates that the length of the  $T-N\equiv C-Co$  chain is determined by the strength of the interaction between the  $CN^-$  group and the transition-metal cations. These results implicate that the pore width of cubic hexacyanocobaltates can be easily tuned by selecting the appropriate outer transition-metal cation (T). Outer transition-metal cations with higher electronegativity will lead to lower cell edge length, that is to say, to lower pore width.

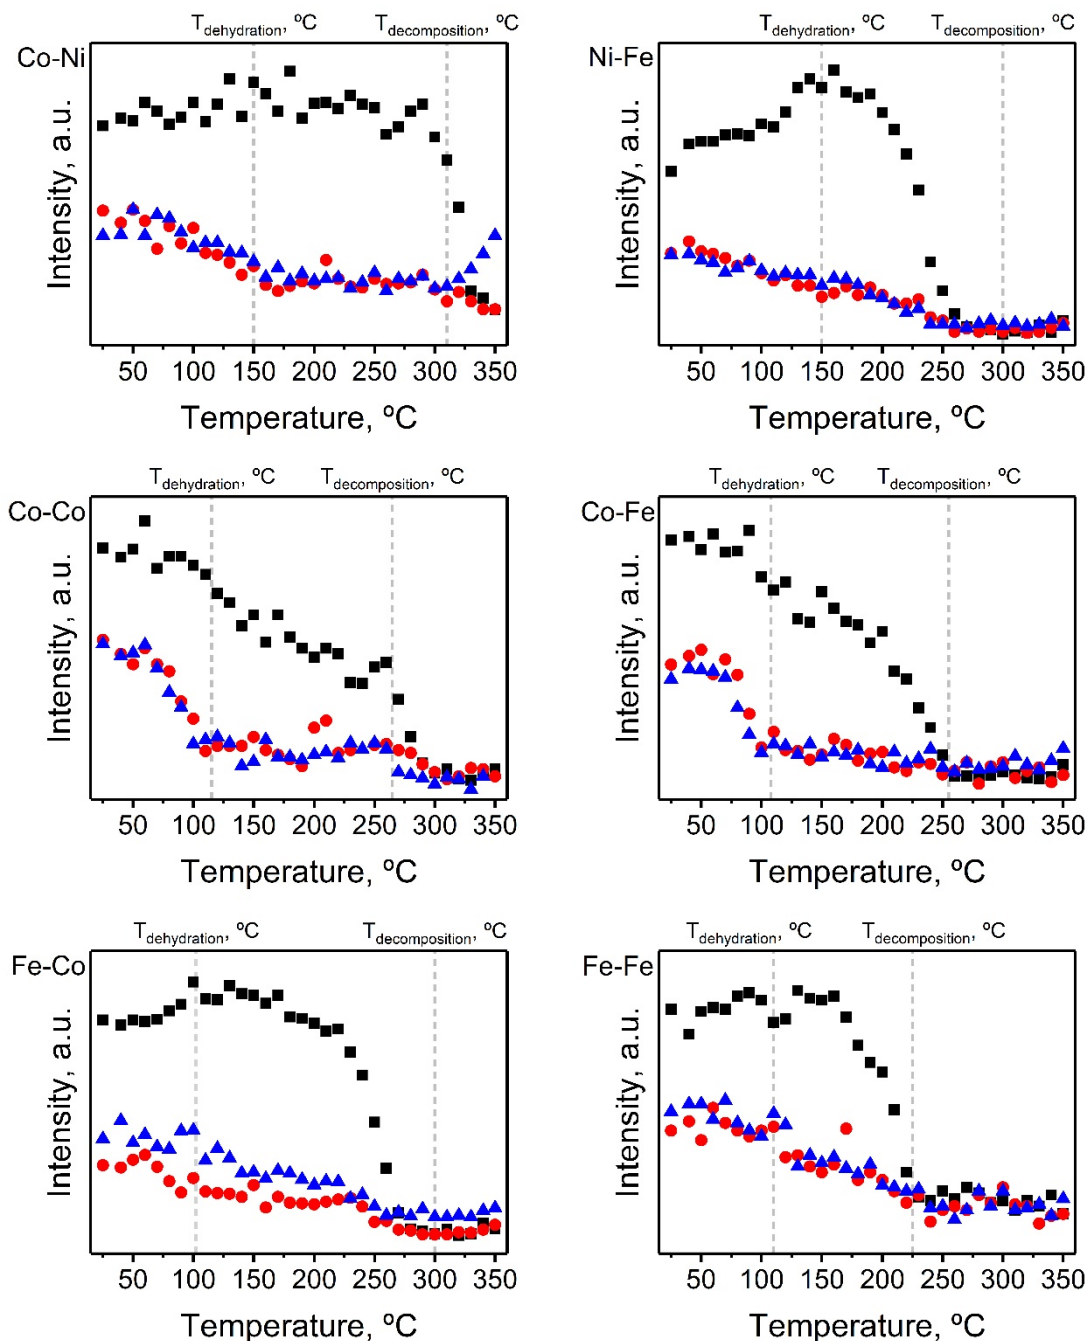

**Figure S3.** Evolution of main hexacyanometallates(III) XRD peaks intensity with temperature. (■  $2\theta \approx 17.5^\circ$  (200), ●  $2\theta \approx 24.9^\circ$  (220), ▲  $2\theta \approx 35.4^\circ$  (400)).

XRD peaks intensity decreases rapidly upon heating, which evidences a partial collapse of the hexacyanometallates(III) framework due to the loss of structural water. The peak at  $2\theta = 17.5^\circ$ , corresponding to the crystallographic plane (200), can be observed with

appreciable intensity until the decomposition, which indicates that the structure maintains part of its cubic identity.

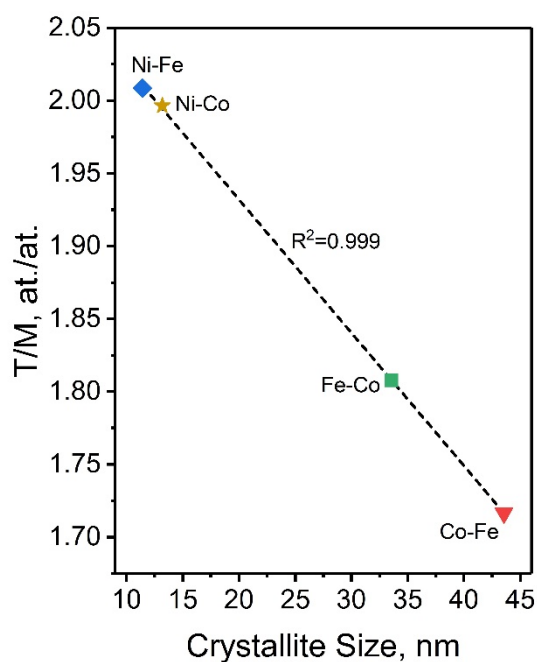

**Figure S4.** Relationship between T/M atomic ratio and crystallite size in the studied porous hexacyanometallates(III).

For the studied porous hexacyanometallates(III), the atomic ratio between the outer (T) and the inner (M) transition-metal cations follows a linear increase with decreasing crystal size. This proves the increase in the number of exposed surface T atom with increasing the surface to volume ratio and shows the ability to modulate the density of active sites by controlling the crystallite size of the complexes.

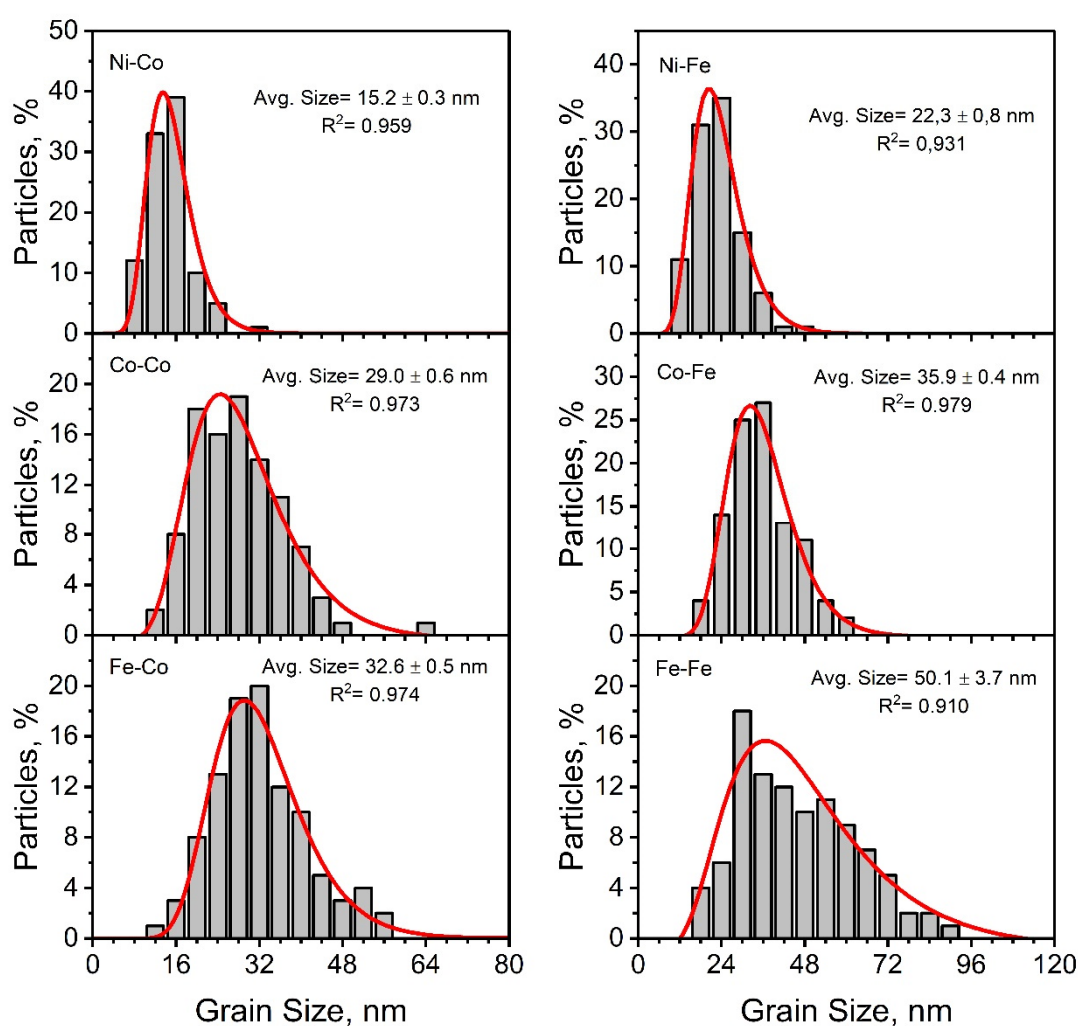

**Figure S5.** PSD of the studied porous hexacyanometallates(III).

Primary particle size distribution (PSD) was determined from TEM micrographs using the software ImageJ. More than 100 particles were counted. Samples show narrow distributions with grain sizes in the nano-range. The crystallite size is also influenced by the combination of the outer ( $\text{Ni}^{2+} < \text{Co}^{2+} < \text{Fe}^{2+}$ ) and inner ( $\text{Co}^{3+} < \text{Fe}^{3+}$ ) transition-metal cations.

**Table S1.** Parameters for the Dubinin-Asthakov equation.

| Compound | $S_{D-A}^a, \text{m}^2/\text{g}$ | $E_0, \text{kJ/mol}$ | $V_p, \text{cm}^3/\text{g}$ | $n$  | $n_p, \text{cm}^3/\text{g STP}$ |
|----------|----------------------------------|----------------------|-----------------------------|------|---------------------------------|
| Ni-Co    | 410                              | 34.9                 | 0.146                       | 1.91 | 94.3                            |
| Co-Co    | 914                              | 27.8                 | 0.325                       | 1.58 | 210.0                           |
| Fe-Co    | 868                              | 24.0                 | 0.309                       | 1.51 | 199.5                           |
| Ni-Fe    | 182                              | 37.5                 | 0.065                       | 1.45 | 41.8                            |
| Co-Fe    | 751                              | 26.1                 | 0.267                       | 1.35 | 172.6                           |
| Fe-Fe    | 274                              | 17.8                 | 0.097                       | 1.27 | 63.0                            |

a: Apparent surface area quantified from the amount of  $\text{N}_2$  required to fill the micropores.

The Dubinin-Asthakov (D-A) method is a recurrently used procedure for the evaluation of the adsorption capacity in microporous materials. It has been employed in the study of zeolites, carbons, cyanometallates and related materials.  $\text{N}_2$  adsorption data were fitted to the D-A equation [86]:

$$n_{ads} = n_p \cdot \exp \left\{ - \left[ \frac{R \cdot T}{E_0} \ln \left( \frac{P}{P_0} \right) \right]^n \right\} \quad (S2)$$

where  $n_{ads}$ : amount adsorbed at relative pressure  $P/P_0$  and temperature  $T$ ,  $n_p$ : the limiting micropore volume,  $E_0$ : the characteristic energy of adsorption,  $n$ : the heterogeneity parameter,  $R$ : the universal gas constant; and  $T$  is the absolute temperature. The model was adjusted to the experimental data using a non-linear least squares fitting. For calculations,  $n_p$  and  $E_0$  values were first estimated using the Dubinin-Radushkevich (D-R) method ( $n=1$ ).

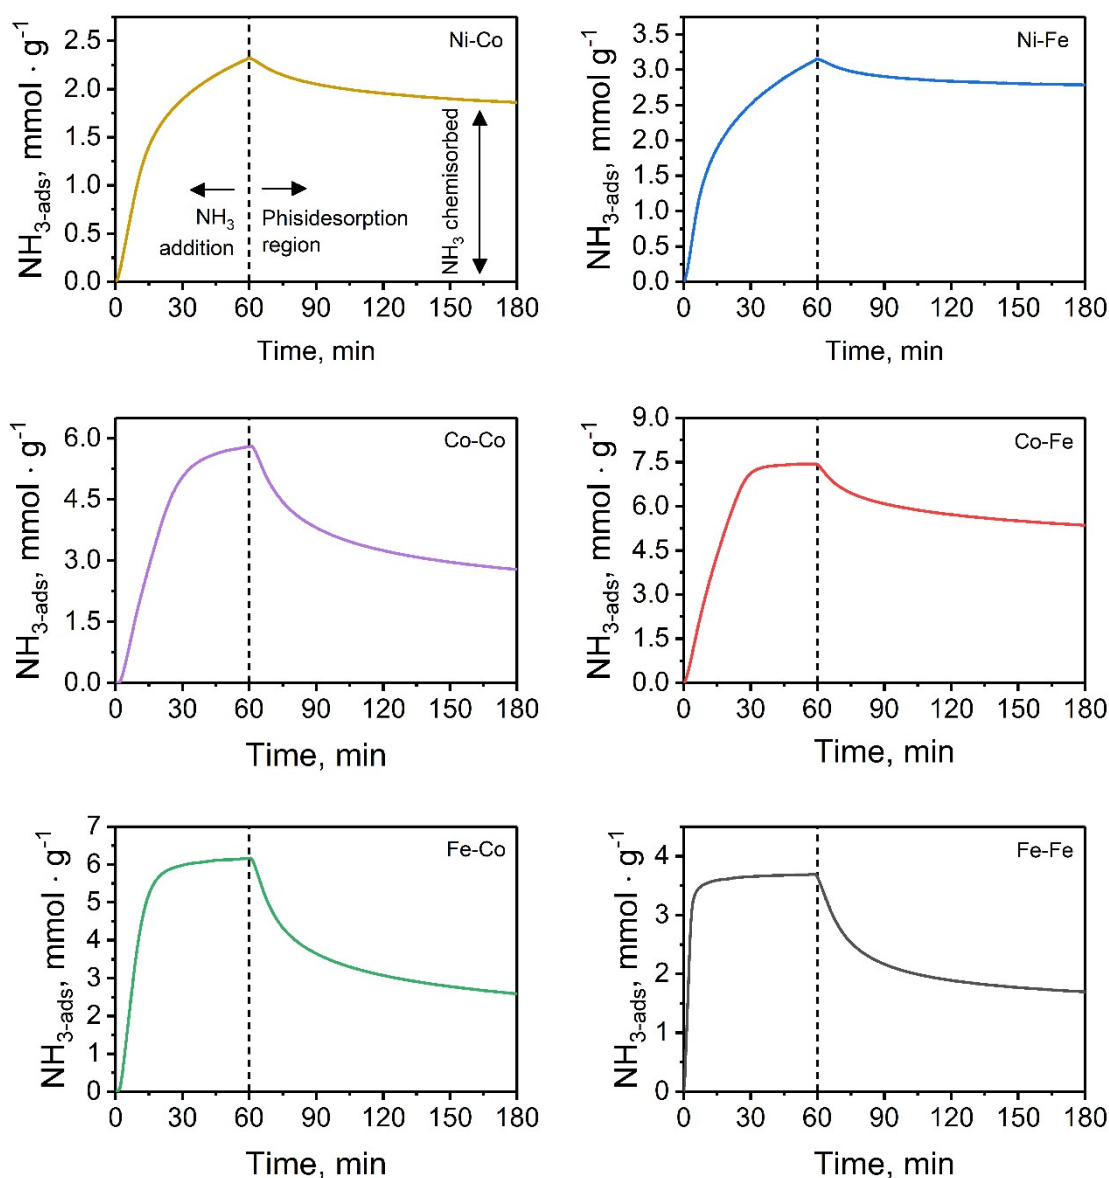

**Figure S6.**  $\text{NH}_3$ -saturation curves of the different porous hexacyanometallates(III) studied.

The density of coordinatively unsaturated metal sites (CUMSs) or Lewis acid sites (LASs) was measured by gas-solid titration with  $\text{NH}_3$ . Experiments were carried out in a TG equipment. Initially, a stream containing  $\text{NH}_3$  was fed to the furnace and a weight gain was observed as  $\text{NH}_3$  was adsorbed. After an hour, the furnace feed was switched to an inert atmosphere (He) so that the physisorbed  $\text{NH}_3$  could be released. The total amount

of  $\text{NH}_3$  chemisorbed was measured gravimetrically from the weight gain of the sample at the end of the physidesorption step.

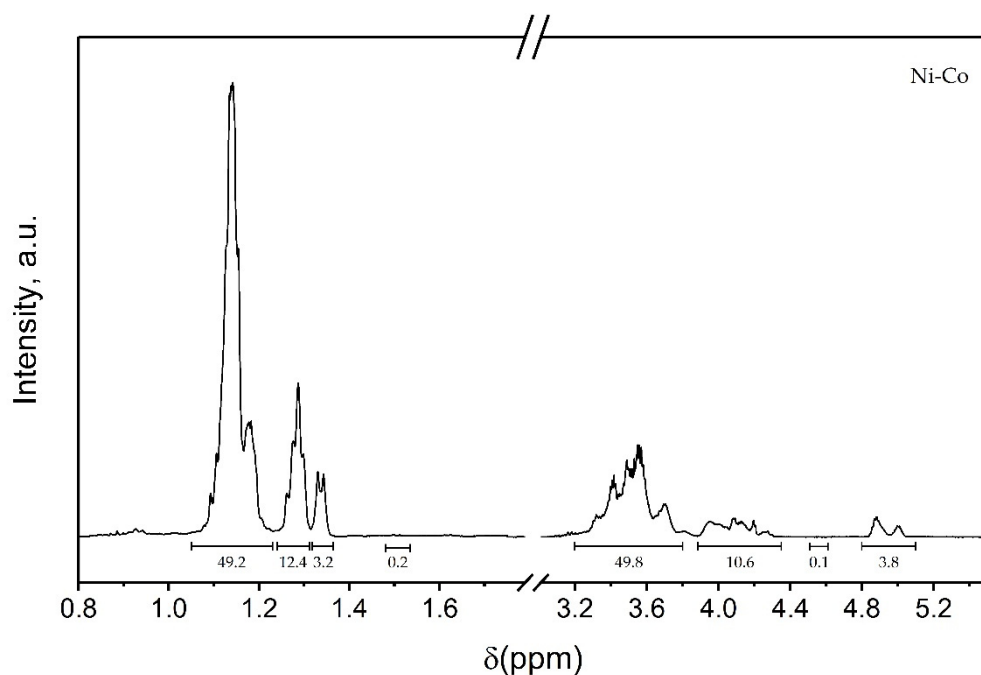

Figure S7. Detailed  $^1\text{H}$ -NMR spectrum for the product obtained employing the Ni-Co complex.

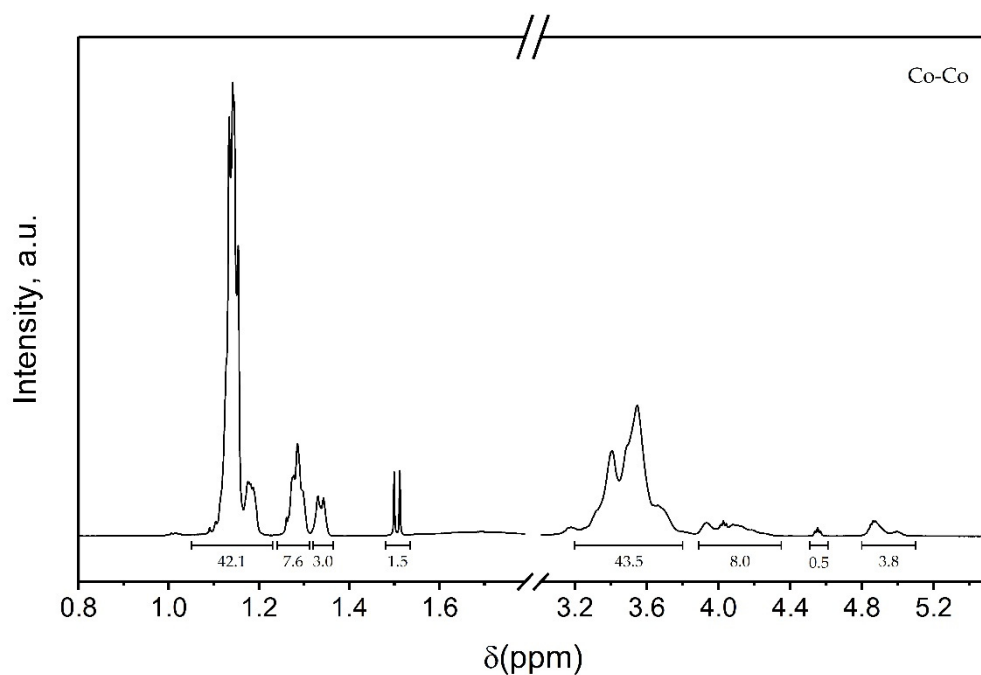

Figure S8. Detailed  $^1\text{H}$ -NMR spectrum for the product obtained employing the Co-Co complex.

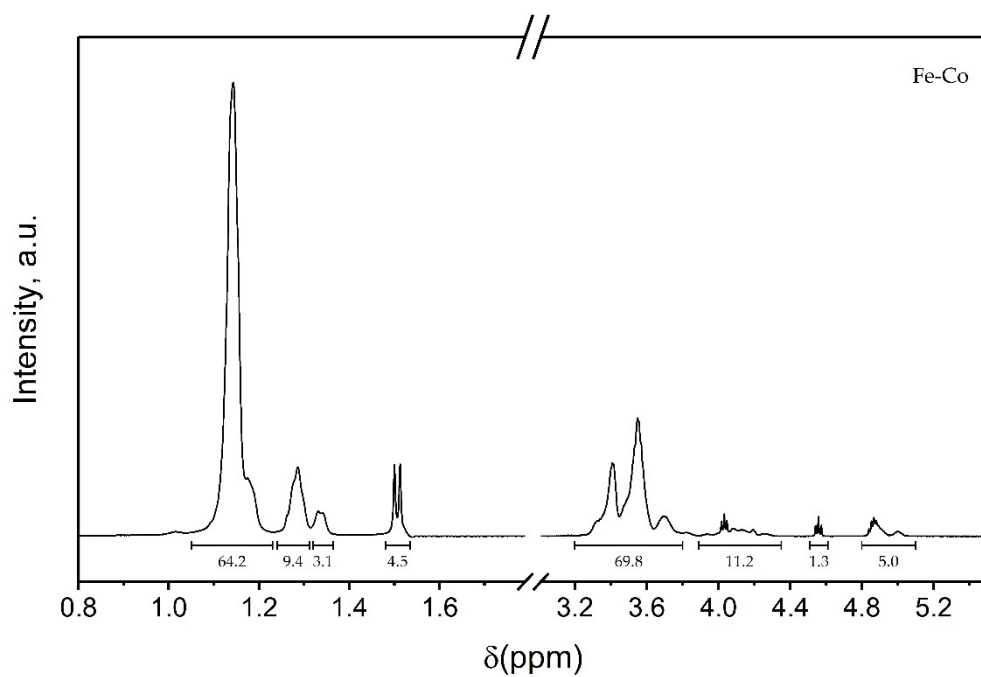

Figure S9. Detailed <sup>1</sup>H-NMR spectrum for the product obtained employing the Fe-Co complex.

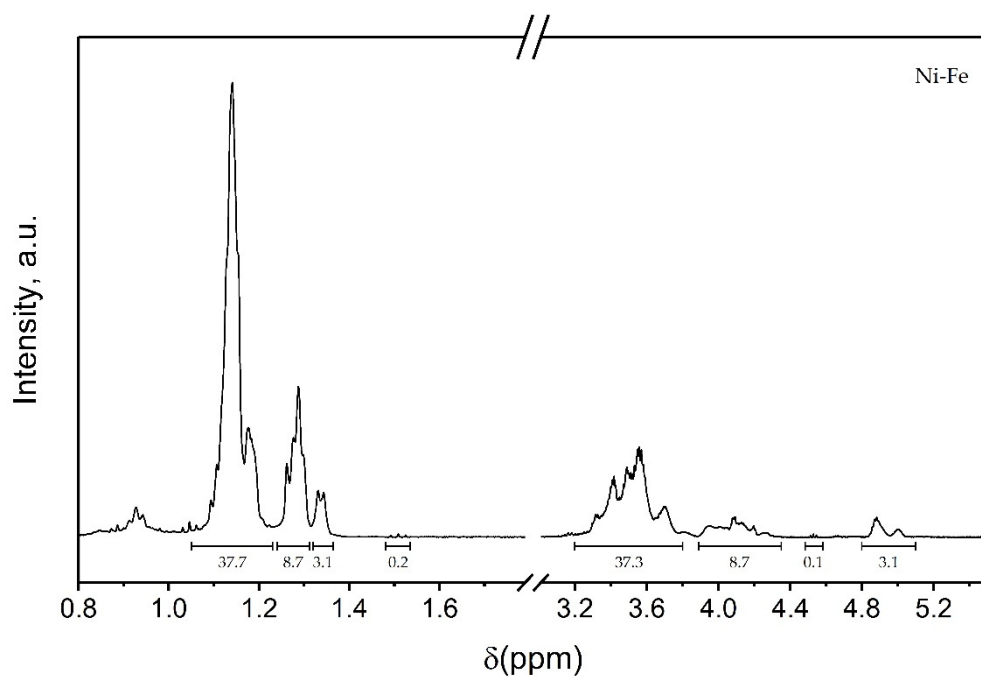

Figure S10. Detailed <sup>1</sup>H-NMR spectrum for the product obtained employing the Ni-Fe complex.



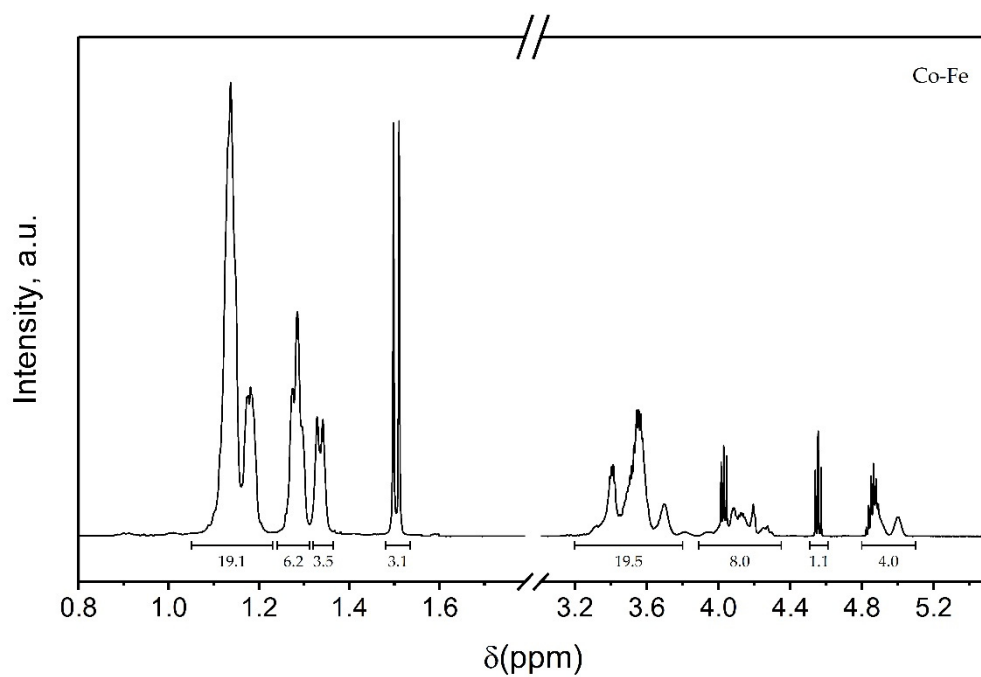

**Figure S11.** Detailed <sup>1</sup>H-NMR spectrum for the product obtained employing the Co-Fe complex.

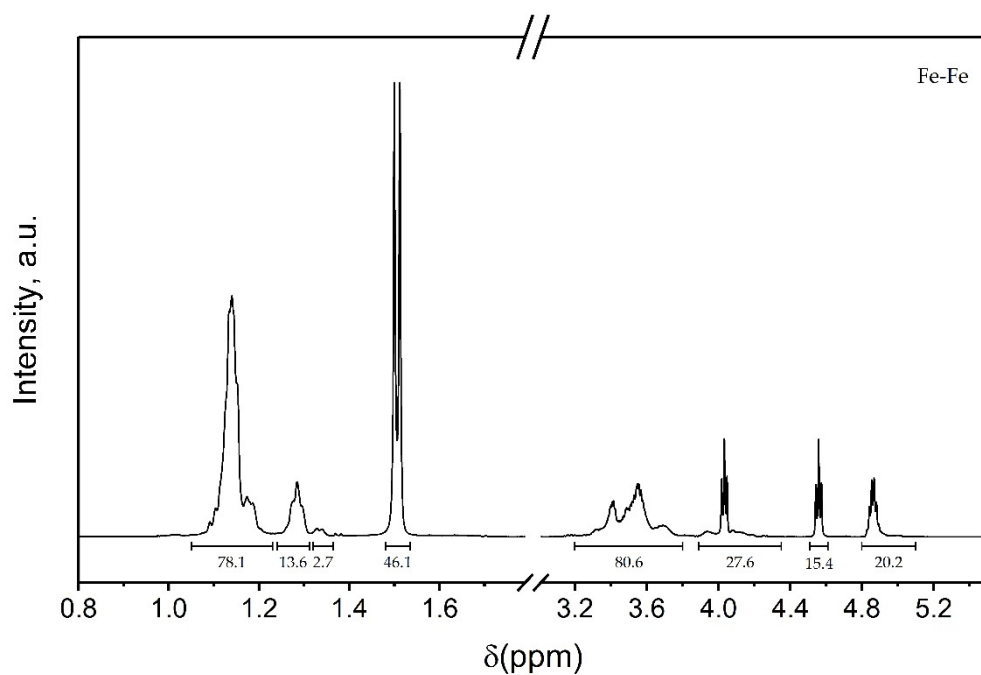

**Figure S12.** Detailed <sup>1</sup>H-NMR spectrum for the product obtained employing the Fe-Fe complex.

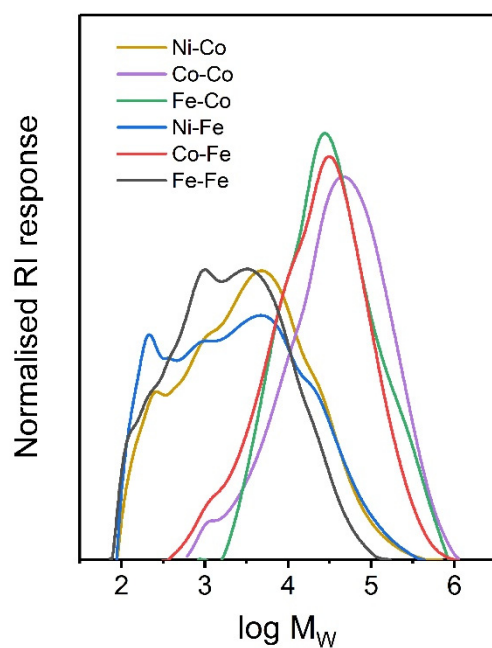

**Figure S13.** SEC plots ( $\log M_w$ ) of the polyethercarbonates (PECs) formed using the studied porous hexacyanometallates(III).

The obtained polyethercarbonates (PECs) show moderate molecular weight values and broad dispersity, which is characteristic of heterogeneous polymerization catalysts.
